# Supplementary material for: Improving timely analgesia administration for musculoskeletal pain in the emergency department
Source: PubMed Central journal article supplement — BMJ Open Qual. 2020 Jan 7;9(1):e000797. doi: 10.1136/bmjoq-2019-000797 (PMC7011892; doi:10.1136/bmjoq-2019-000797), 2020-01-07
Supplement: bmjoq-2019-000797supp002.pdf [file bmjoq-2019-000797supp002.pdf]

Appendix B: Quick Reference Badge Tag

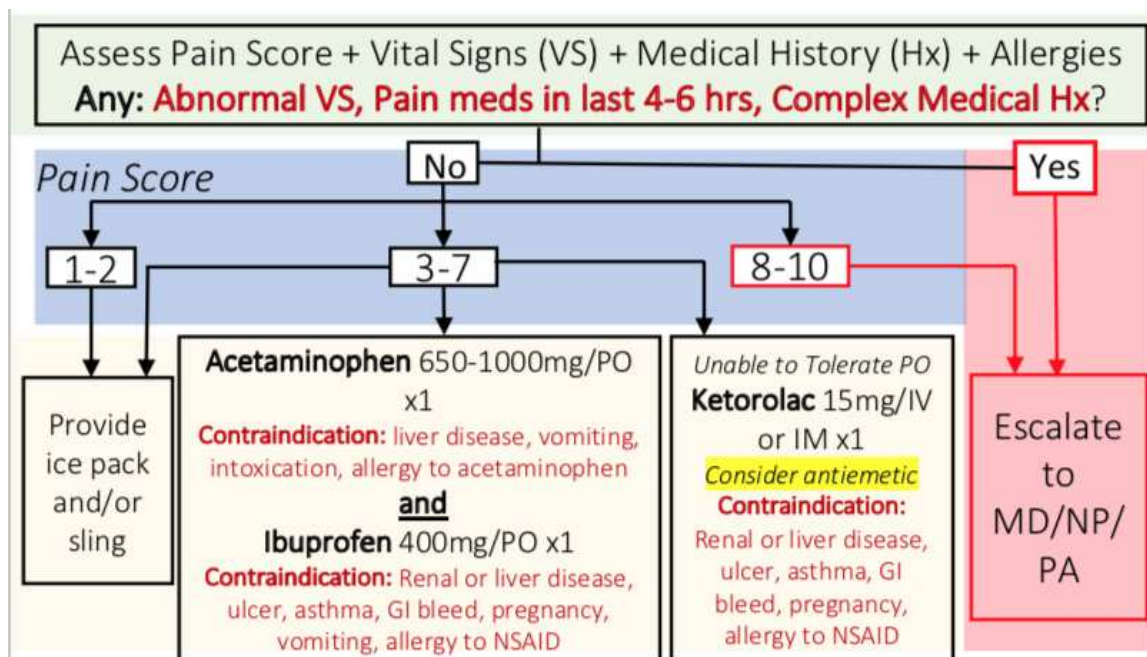

Front of Badge Tag

| ED Medical Directive Medication                                           | Administration Criteria                    | Contraindications and Precautions                                                       |
|---------------------------------------------------------------------------|--------------------------------------------|-----------------------------------------------------------------------------------------|
| <b>DO NOT GIVE IF: history of allergy/sensitivity to drug/drug class.</b> |                                            |                                                                                         |
| <b>ASA 160mg PO to chew x1</b>                                            | Acute coronary syndrome type chest pain    | Renal or liver disease, ulcer, asthma, GI bleed, pregnancy, vomiting, NSAID in last 6hr |
| <b>Dextrose 50% (D50W) 25mg (50mL)/IV x1</b>                              | Glucose less than 2.8mmol                  | None                                                                                    |
| <b>Dimenhydrinate 50mg PO/IV/IM x1</b>                                    | Nausea/vomiting, dizzy, age 16 to 64       | Dementia/delirium, bradycardia, decreased LOC                                           |
| <b>Ondansetron 4mg IV/IM x1</b>                                           | Nausea/vomiting                            | Pregnancy, QT prolongation                                                              |
| <b>Salbutamol 4 puff/q15-30min x 3</b>                                    | Short of breath; history of asthma or COPD | Allergy/sensitivity to medication                                                       |
| <b>TD Vaccine 0.5mL/IM x1</b>                                             | Skin injury or eye injury                  | Td booster within 10 years                                                              |

Back of Badge Tag
